# Supplementary material
Source: PubMed Central journal article supplement (PMC6902236)
Supplement: jamapsychiatry-77-237-s002.pdf [file jamapsychiatry-77-237-s002.pdf]

## Data Sharing Statement

DeRubeis. Prevention of Recurrence After Recovery From a Major Depressive Episode With Antidepressant Medication Alone or in Combination With Cognitive Behavioral Therapy. *JAMA Psychiatry*. Published December 04, 2019. 10.1001/jamapsychiatry.2019.3900

### Data

**Data available:** No

### Additional Information

**Explanation for why data not available:** We will work to make the data available, but the dataset, with sufficient definitions for others to understand, is not yet ready.
